# Supplementary material for: Photocatalytic Activity of TiO2 for the Degradation of Anticancer Drugs
Source: MDPI journal article supplement (doi:10.3390/nano12193532), 2022-10-09
Supplement: s1 [file s1]

## *Supplementary informations*

### **Photocatalytic activity of TiO<sub>2</sub> for degradation of anticancer drugs**

Kristina Tolić Čop<sup>1</sup>, Dragana Mutavdžić Pavlović<sup>1\*</sup>, Tatjana Gazivoda Kraljević<sup>2</sup>

<sup>1</sup> Department of Analytical Chemistry, Faculty of Chemical Engineering and Technology, University of Zagreb, Marulićev trg 19, 10000 Zagreb, Croatia

<sup>2</sup> Department of Organic Chemistry, Faculty of Chemical Engineering and Technology, University of Zagreb, Marulićev trg 19, 10000 Zagreb, Croatia

#### **List of figures:**

**Figure S1** Nitrates influence on degradation of pharmaceuticals without photocatalyst addition

**Figure S2** Absorption spectrum of humic acids and pharmaceuticals

#### **List of tables:**

**Table S1** MS/MS analysis of IMT

**Table S2** MS/MS analysis of CRZ

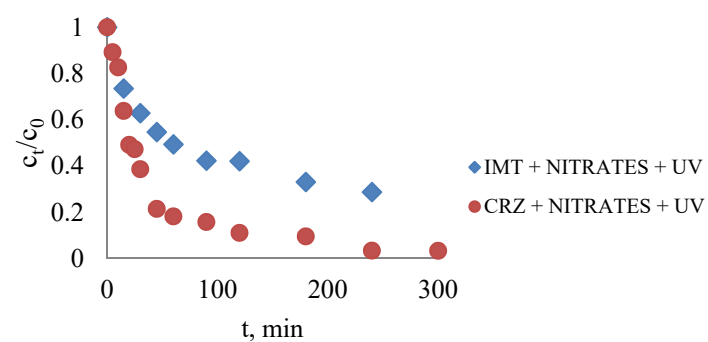

**Figure S1** Nitrates influence on degradation of pharmaceuticals without photocatalyst addition

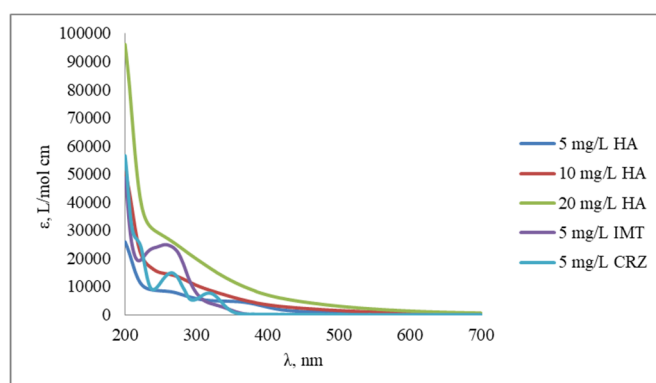

**Figure S2** Absorption spectrum of humic acids and pharmaceuticals

**Table S1** MS/MS analysis of IMT

| Compound | $t_R$ ,<br>min | Fragmentation      |                            |
|----------|----------------|--------------------|----------------------------|
|          |                | Product ions       | collision<br>energy,<br>eV |
| IMT      | 5.823          | 394, 217, 99       | 20                         |
| DP-1     | 0.866          | 156, 132, 78       | 20                         |
| DP-2     | 0.900          | 134, 106, 99       | 20                         |
| DP-3     | 6.239          | 478, 423, 394, 277 | 40                         |
| DP-4     | 7.070          | 394, 352, 247      | 40                         |
| DP-5     | 7.170          | 394, 259, 135      | 40                         |
| DP-6     | 7.702          | 408, 380, 261, 149 | 20                         |
| DP-7     | 8.334          | 392, 261, 133      | 40                         |

**Table S2** MS/MS analysis of CRZ

| Compound | $t_R$ ,<br>min | Fragmentation      |                            |
|----------|----------------|--------------------|----------------------------|
|          |                | Product ions       | collision<br>energy,<br>eV |
| CRZ      | 7.013          | 367, 260, 177      | 20                         |
| DP-1     | 3.693          | 272, 229, 189      | 20                         |
| DP-2     | 3.823          | 331, 316, 259      | 40                         |
| DP-3     | 4.637          | 322, 227, 209      | 20                         |
| DP-4     | 4.757          | 414, 387, 304, 253 | 20                         |
| DP-5     | 6.52           | 399, 331, 316      | 40                         |
| DP-6     | 8.147          | 447, 382, 273      | 40                         |
| DP-7     | 8.546          | 381, 356, 285      | 40                         |
| DP-8     | 8.815          | 348, 305, 234      | 40                         |
| DP-9     | 8.915          | 354, 190           | 40                         |
| DP-10    | 9.062          | 288, 177, 112      | 20                         |
| DP-11    | 9.48           | 492, 302, 177      | 20                         |
| DP-12    | 9.644          | 462, 299, 272      | 20                         |
| DP-13    | 5.576          | 219, 202, 190      | 20                         |
| DP-14    | 7.166          | 428, 279, 208      | 40                         |
| DP-15    | 3.387          | 165, 147, 125      | 20                         |
